# Supplementary material for: A tissue-intrinsic IL-33/EGF circuit promotes epithelial regeneration after intestinal injury
Source: PubMed Central journal article supplement (PMC10480426; doi:10.1038/s41467-023-40993-5), 2023-09-05
Supplement: 41467_2023_40993_MOESM1_ESM.pdf [file 41467_2023_40993_MOESM1_ESM.pdf]

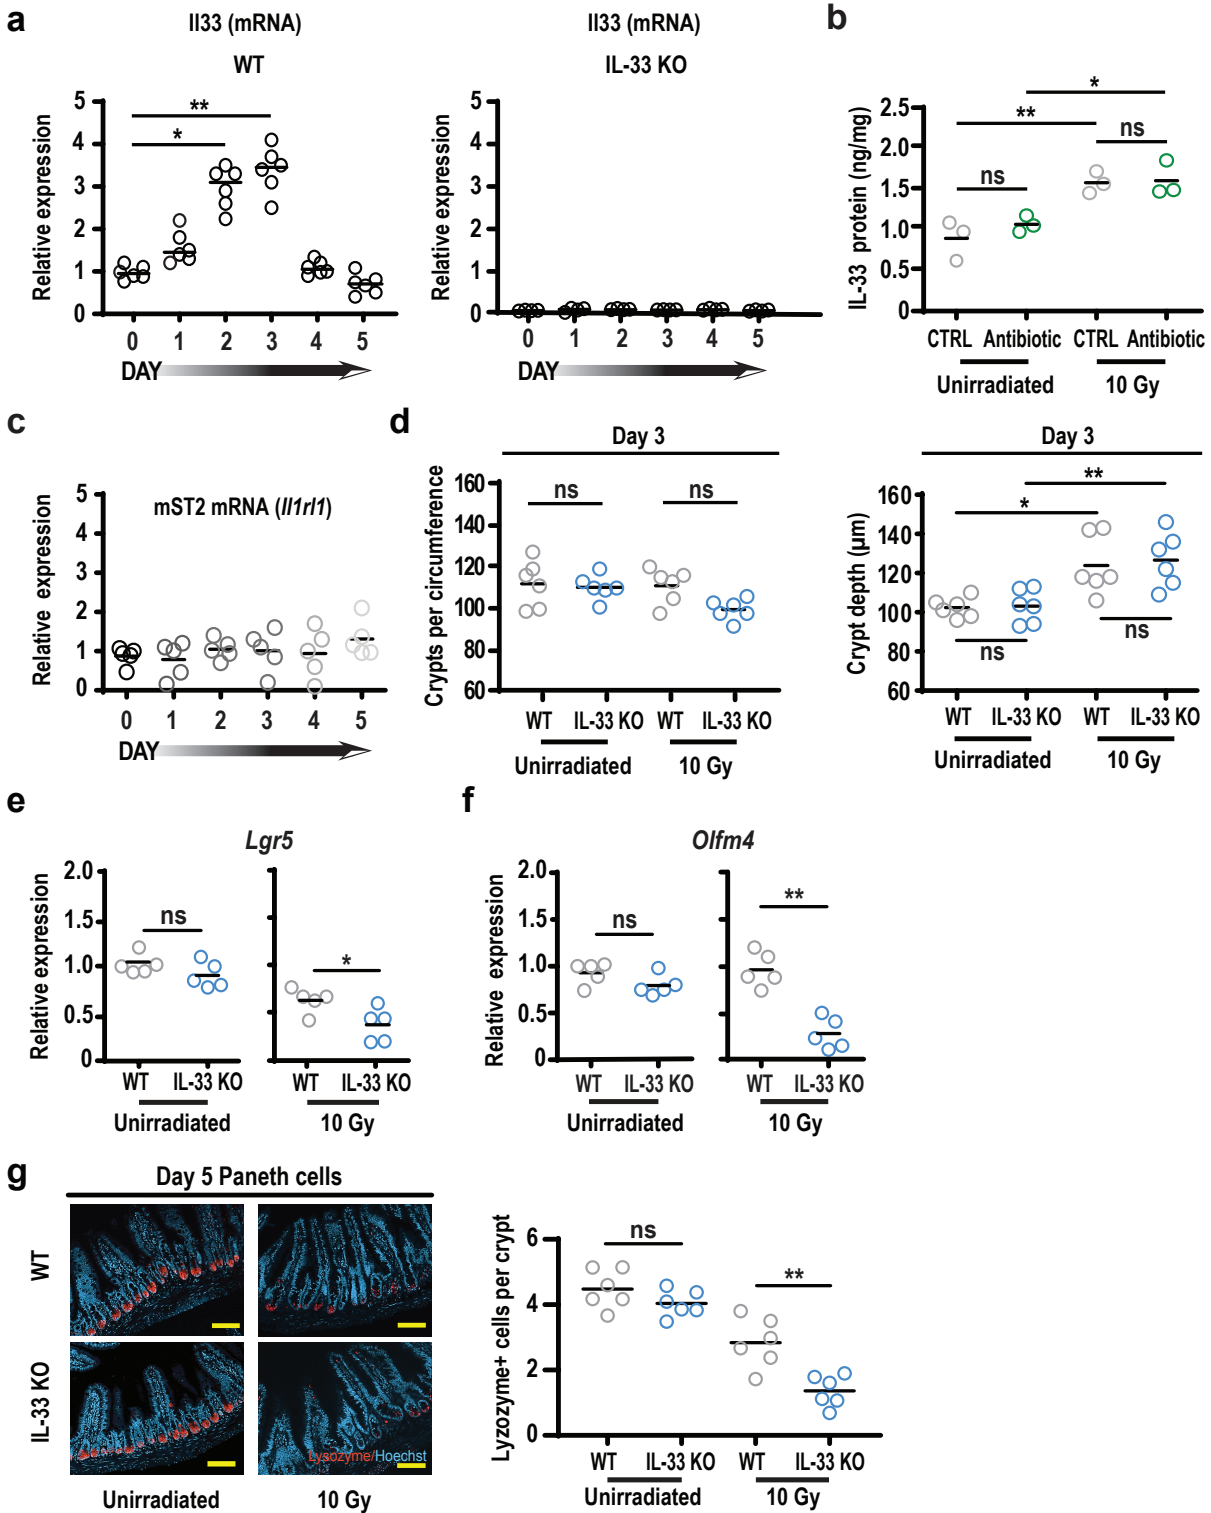

**Figure S1. IL-33 quantification after radiation injury (10 Gy TBI).** a, Time course of IL-33 expression in small intestine (SI) crypts isolated from WT and IL-33 KO mice after TBI; measured

by qPCR (n=6 WT and n=4 IL-33 KO mice/group). **b**, SI IL-33 protein from irradiated mice +/- pretreatment with Enrofloxacin and Ampicillin for one week prior to TBI (n=3 mice/group); measured by ELISA and normalized by the amount of total protein. **c**, Time course of membrane-bound ST2 expression in SI crypts isolated from WT mice after TBI; measured by qPCR (n=5 mice/group). **d**, Measurement of SI crypt number and depth in WT and IL-33 KO mice three days after TBI. Data combined from two independent experiments (n=6 mice/group). **e-f**, Relative expression of ISC markers *Lgr5* (**e**) and *Olfm4* (**f**) determined by qPCR in SI crypts isolated from WT and IL-33 KO mice at baseline or five days after irradiation (10 Gy); data combined from two experiments (n=5 mice per group). **g**, WT and IL-33 KO mouse ileum analyzed five days after TBI (10 Gy). Shown are quantification and representative immunofluorescent images of anti-lysozyme (red) and DAPI nuclear stain (blue) in WT and IL-33 KO mice before and after TBI (n=6 mice/group, combined from two independent experiments); scale bars: 100  $\mu$ m. Statistical analyses performed using Kruskal-Wallis multiple comparison testing (**a**, **c**), ANOVA multiple comparison testing (**b**, **d**, **g**), or two-tailed Mann-Whitney U test (**e**, **f**). Graphs indicate the mean for each group; \*p<.05, \*\*p<.01, \*\*\*p<.001. Source data for graphs are provided in the Source Data file. The exact p values are as follows:

(**a**) comparisons made vs. day 0; WT day 0 vs day 2, p= 0.017; WT day 0 vs day 3, p= 0.034;

(**b**) unirradiated CTRL vs unirradiated Antibiotic, p=0.67; unirradiated CTRL vs 10 Gy CTRL, p=0.006; unirradiated Antibiotic vs 10 Gy Antibiotic, p= 0.03; 10 Gy CTRL vs 10 Gy Antibiotic, p=0.99;

(**d**) crypts per circumference, unirradiated WT vs unirradiated KO, p=0.99; crypts per circumference, 10 Gy WT vs 10 Gy KO, p=0.126; crypt depth, unirradiated WT vs unirradiated KO, p=0.99; crypt depth, unirradiated WT vs 10 Gy WT, p=0.02; crypt depth, unirradiated KO vs 10 Gy KO, p=0.009; crypt depth, 10 Gy WT vs 10 Gy KO, p=0.97;

(**e**) unirradiated, p=0.24; 10 Gy, p=0.047;

(**f**) unirradiated, p=0.15; 10 Gy, p=0.008;

(**g**) unirradiated WT vs unirradiated KO, p=0.547; 10 Gy WT vs 10 Gy KO, p=0.0012.

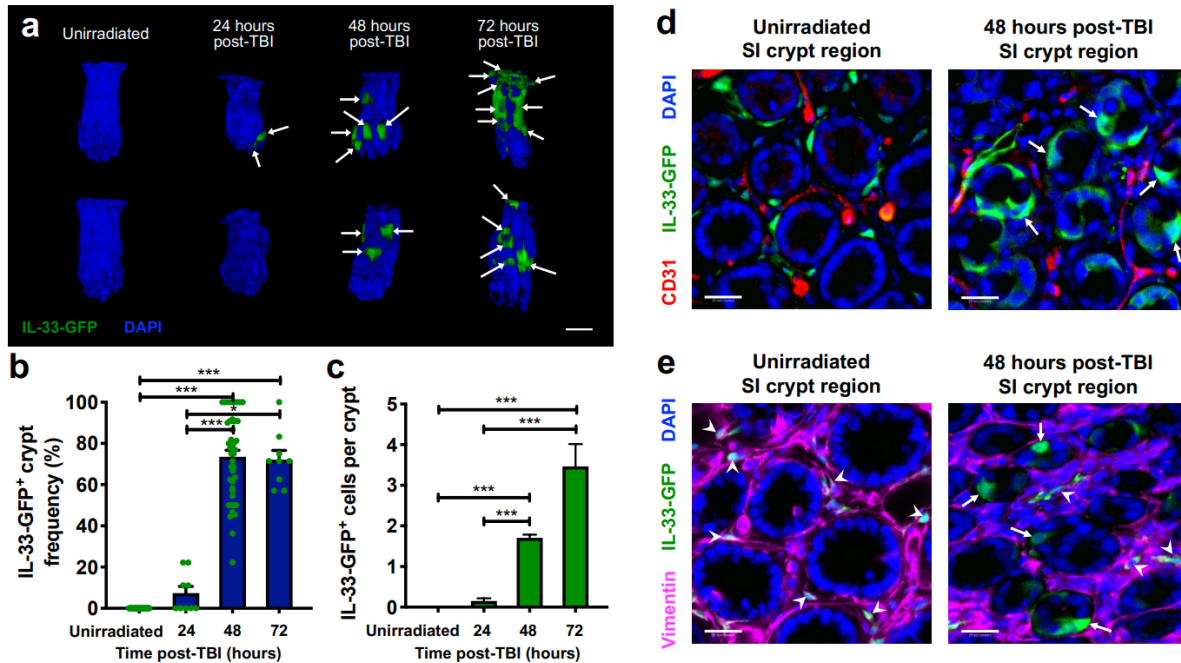

**Figure S2. Ileal IL-33 expression within 72 hours of radiation injury.** **a**, Representative three-dimensional (3-D) images of crypt IL-33-GFP expression during homeostasis and 24-72 hours after TBI (10 Gy); green: IL33-GFP<sup>+</sup> cells (anti-GFP staining); blue: nuclei (DAPI staining). **b**, Proportion of crypts with IL33-GFP<sup>+</sup> cells out of the total number of crypts per 3-D field; n=47 (Unirradiated), n=9 (24h), n=45 (48h), and n=9 (72h) independent 3-D fields. **c**, Quantification of IL33-GFP<sup>+</sup> cells within each crypt; n=379 (Unirradiated), n=73 (24h), n=476 (48h), and n=56 (72h) crypts/group. **d**, 2-D optical slices from 3-D imaging of crypt regions with staining for blood vessels (anti-CD31, red), indicating no overlap with IL-33-GFP expression (green); blue: nuclei (DAPI). **e**, 2-D optical slices from 3-D imaging of crypt regions with vimentin staining (magenta), indicating colocalization with stromal IL-33-GFP expression before and after irradiation, and no overlap with IL-33-GFP expression arising within crypts following irradiation; green: IL-33-GFP; blue: nuclei (DAPI). Arrowheads indicate IL33-GFP<sup>+</sup> fibroblasts (vimentin<sup>+</sup> cells). Arrows indicate IL33-GFP<sup>+</sup> crypt cells; scale bars: 25  $\mu$ m. Statistical analyses performed using Kruskal-Wallis multiple comparison testing. Bar graphs show means, and error bars indicate SEM; \*p<0.05 and \*\*\*p<0.001. Source data for graphs are provided in the Source Data file. The exact p values are:

(b) unirradiated vs 48h, p<0.0001; unirradiated vs 72h, p<0.0001; 24h vs 48h, p=0.0003; 24h vs 72h, p=0.0161;

(c) unirradiated vs 48h,  $p < 0.0001$ ; unirradiated vs 72h,  $p < 0.0001$ ; 24h vs 48h,  $p < 0.0001$ ; 24h vs 72h,  $p < 0.0001$ .

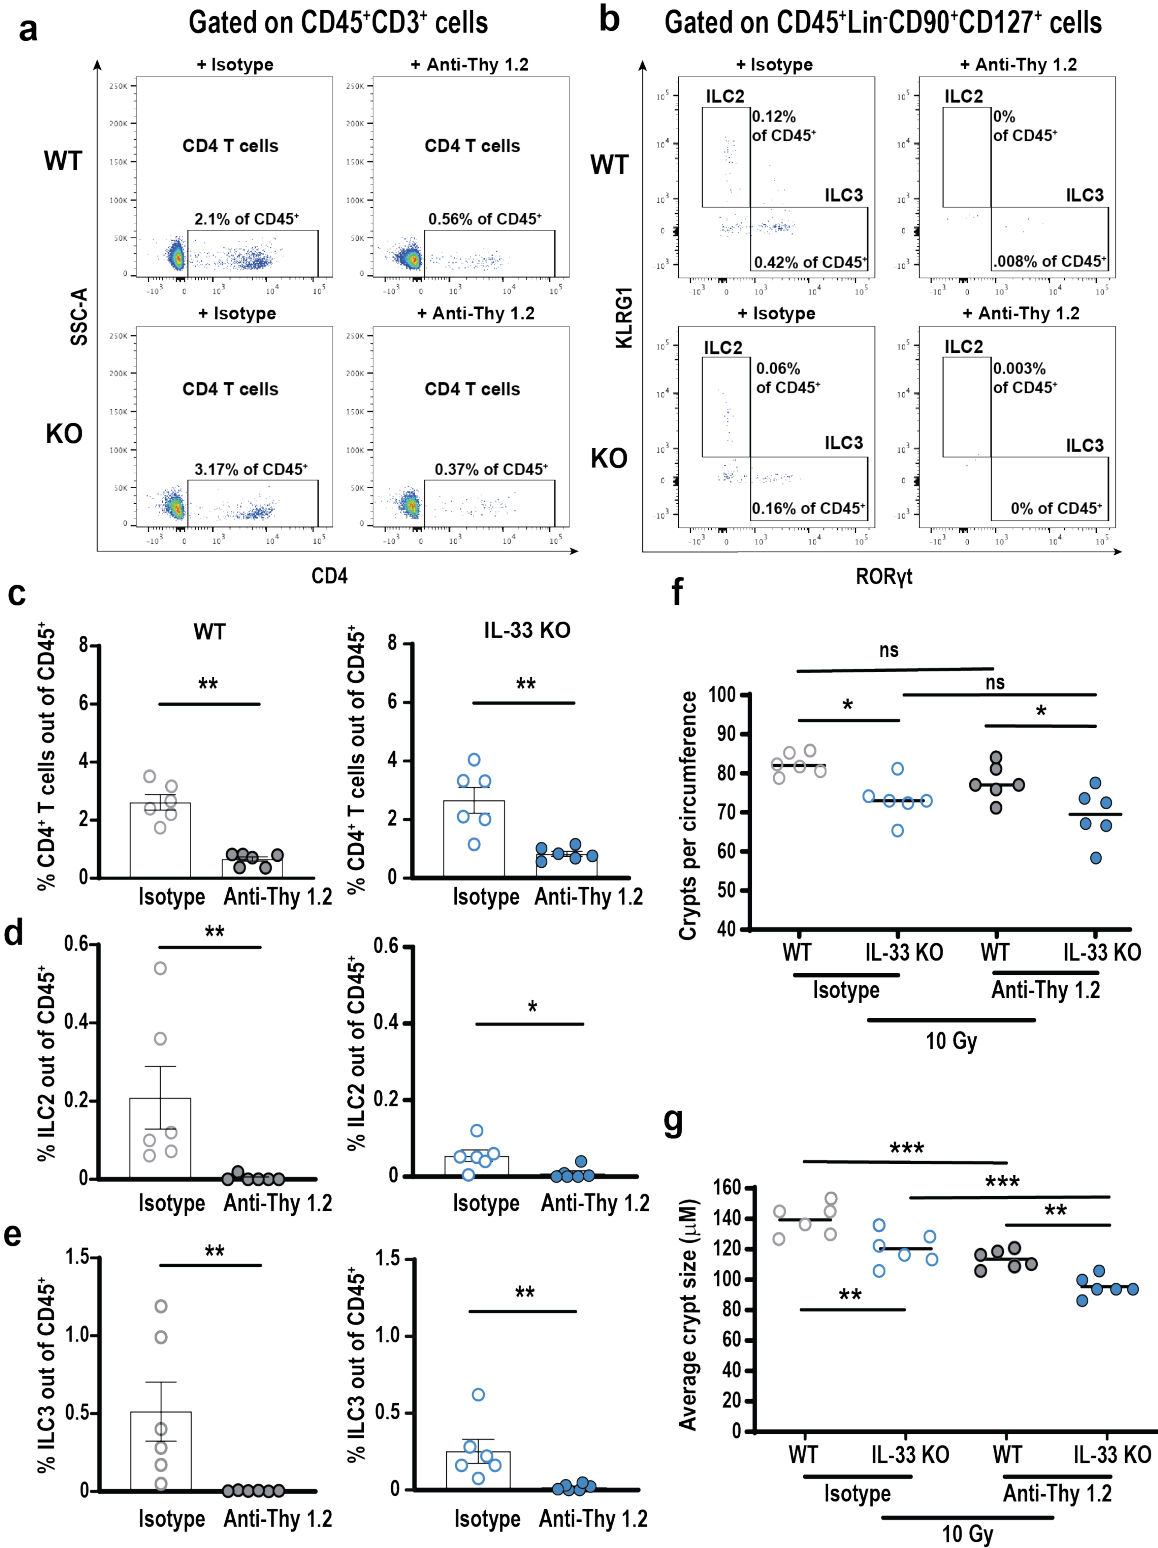

**Figure S3. Anti-Thy1-mediated depletion of intestinal lymphocytes in WT and IL-33 KO mice.** WT and IL-33 KO mice were treated with anti-Thy1.2 or isotype control antibodies on day

-4 and day -1 before TBI (10 Gy). Five days after irradiation, small intestines were harvested to perform flow cytometry and histologic analysis. **a**, Representative FACS plots of CD4<sup>+</sup> T cells (gated on live, CD45<sup>+</sup>CD3<sup>+</sup> cells) isolated from intestinal lamina propria of WT and IL-33 KO mice treated with anti-Thy1.2 or isotype antibodies. **b**, Representative FACS plots of ILC2s (live, lineage-negative, CD45<sup>+</sup>CD90<sup>+</sup>CD127<sup>+</sup>KLRG1<sup>+</sup>RORγt<sup>-</sup> cells) and ILC3s (live, lineage-negative, CD45<sup>+</sup>CD90<sup>+</sup>CD127<sup>+</sup>RORγt<sup>+</sup>KLRG1<sup>-</sup> cells) isolated from intestinal lamina propria of WT and IL-33 KO mice treated with anti-Thy1.2 or isotype antibodies. Lineage-negative (Lin<sup>-</sup>) cells were negative for CD3, CD19, CD11b, CD11c, Gr-1, and Ter-119 lineage-defining markers. **c**, CD4<sup>+</sup> T cell frequencies out of CD45<sup>+</sup> lamina propria lymphocytes (LPLs) isolated from WT or IL-33 KO mice. **d**, ILC2 frequencies out of CD45<sup>+</sup> LPLs isolated from WT or IL-33 KO mice. **e**, ILC3 frequencies out of CD45<sup>+</sup> LPLs isolated from WT or IL-33 KO mice. **f-g**, Average crypt number (**f**) and height (**g**) on day 5 after TBI (10 Gy) in mice pretreated with isotype or anti-Thy1.2 depleting antibodies. Statistical analyses were performed using two-tailed Mann-Whitney U test (**c-e**) or one-way ANOVA multiple comparison testing (**f, g**). Bar graphs indicate mean ±SEM; \*p<.05, \*\*p<.01, \*\*\*p<.001; n=6 mice/group combined from two independent experiments.

Source data for graphs are provided in the Source Data file. The exact p values are:

(c) WT, p=0.002; KO, p=0.004;

(d) WT, p=0.002; KO, p=0.01;

(e) WT, p=0.002; KO, p=0.002;

(f) Isotype WT vs Isotype KO, p=0.017; Isotype WT vs Anti-Thy1.2 WT, p=0.3581; Isotype KO vs Anti-Thy1.2 KO, p=0.518; Anti-Thy1.2 WT vs anti-Thy1.2 KO, p=0.0317;

(g) Isotype WT vs Isotype KO, p=0.0056; Isotype WT vs Anti-Thy1.2 WT, p=0.0002; Isotype KO vs anti-Thy1.2 KO, p=0.0003; Anti-Thy1.2 WT vs anti-Thy1.2 KO, p=0.008.

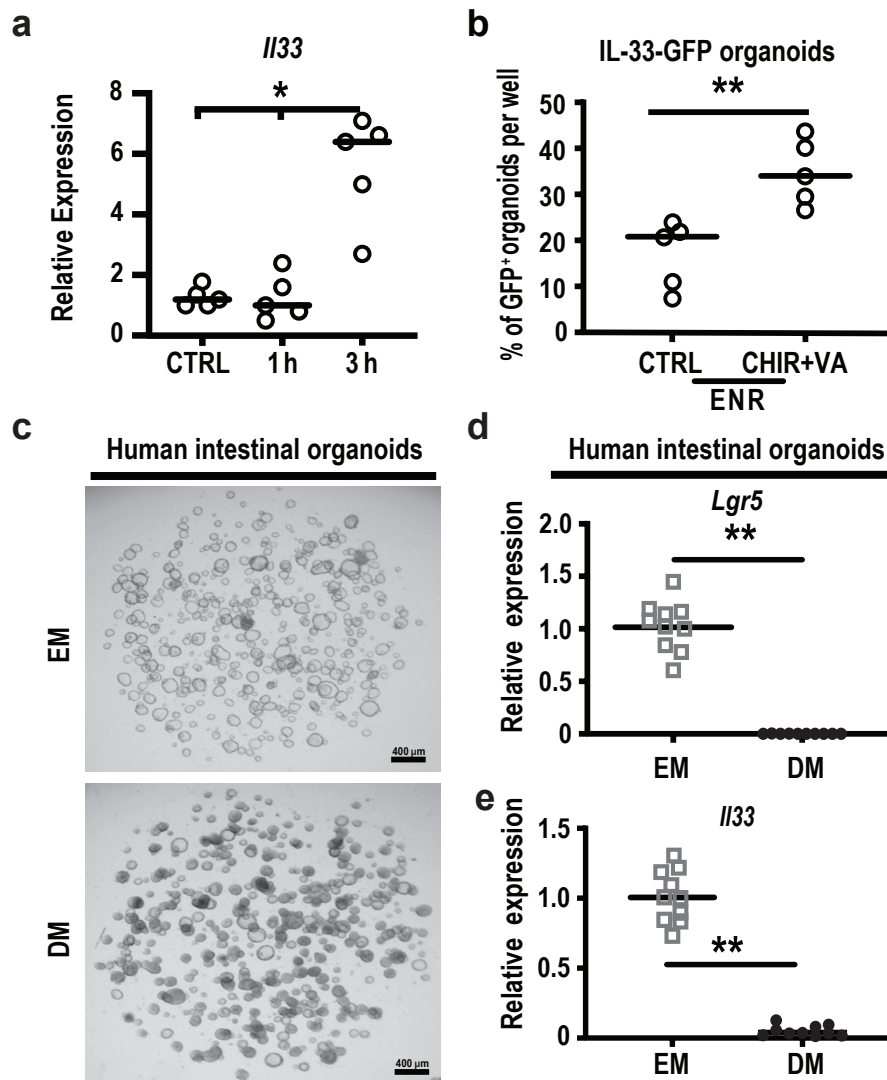

**Figure S4. IL-33 expression *ex vivo*.** **a**, Time course of IL-33 mRNA expression in WT mouse organoids after mechanical disruption (n=5 mice/group, combined from two experiments). **b**, Frequency of GFP-expressing organoids from IL-33-GFP mice after culture +/- CHIR99021 (CHIR, 3 $\mu$ M) and valproic acid (VA, 1mM) for 48 hours; data combined from two experiments (n=5 wells/group). **c**, Representative images of human ileal organoids cultured in expansion media (EM), which promotes ISC expansion, or differentiation media (DM), which promotes differentiation into mature enterocytes. **d-e**, Relative expression of *Lgr5* (**d**) and *Il33* (**e**) in human ileal organoids cultured in EM or DM (n=10 wells/group). Graphs show individual values and means. Statistical analyses were performed using Kruskal-Wallis multiple comparison testing (**a**),

unpaired t-test **(b)**, or two-tailed Wilcoxon test **(d, e)**; \* $p < .05$ , \*\* $p < .01$ . Source data for graphs are provided in the Source Data file. The exact p values are:

**(a)** CTRL vs 3h,  $p = 0.039$ ; 1h vs 3h,  $p = 0.014$ ;

**(b)** CTRL vs CHIR+VA,  $p = 0.005$ ;

**(d)** EM vs DM,  $p = 0.002$ ;

**(e)** EM vs DM,  $p = 0.002$ .



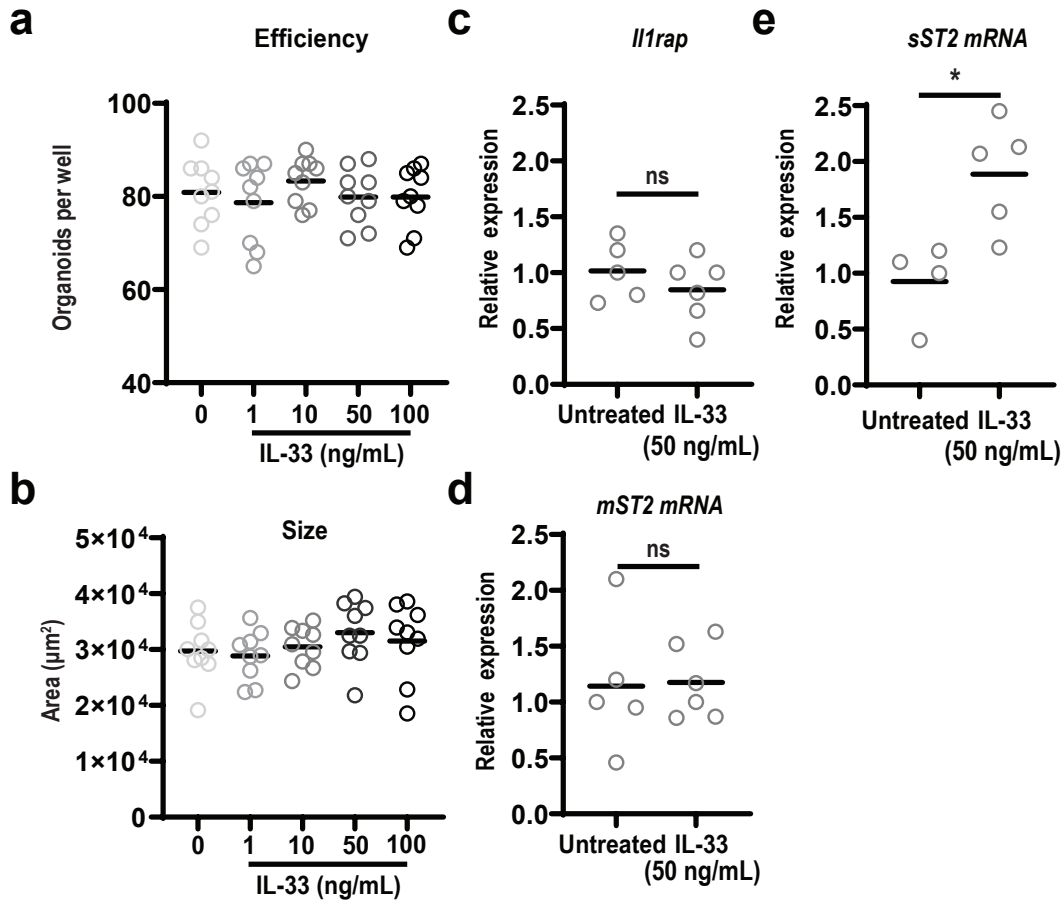

**Figure S5. Mouse small intestine organoid cultures +/- IL-33.** a-b, WT organoid number (a) and size (b) (n=9 wells/group) were assessed after five days in culture with ENR +/- IL-33; data combined from three experiments (n=9 wells/group). c-e, WT organoids assayed by qPCR after culture in ENR +/- IL-33; showing expression of the membrane-bound IL-33 receptor subunits *Illrap* (c) and *mST2* (d), combined from two experiments (n=5 untreated and n=6 IL-33-treated wells/group), and expression of *sST2* (e), combined from two experiments (n=4 untreated and n=5 IL-33-treated wells/group). Statistical analyses were performed using one-way ANOVA multiple comparison testing (a, b) or two-tailed Mann-Whitney U test (c-e). Plots show individual values and means for each group; \*p<.05. Source data for graphs are provided in the Source Data file. The exact p values are: p=0.4502 (c), p=0.9697 (d), and p=0.016 (e).

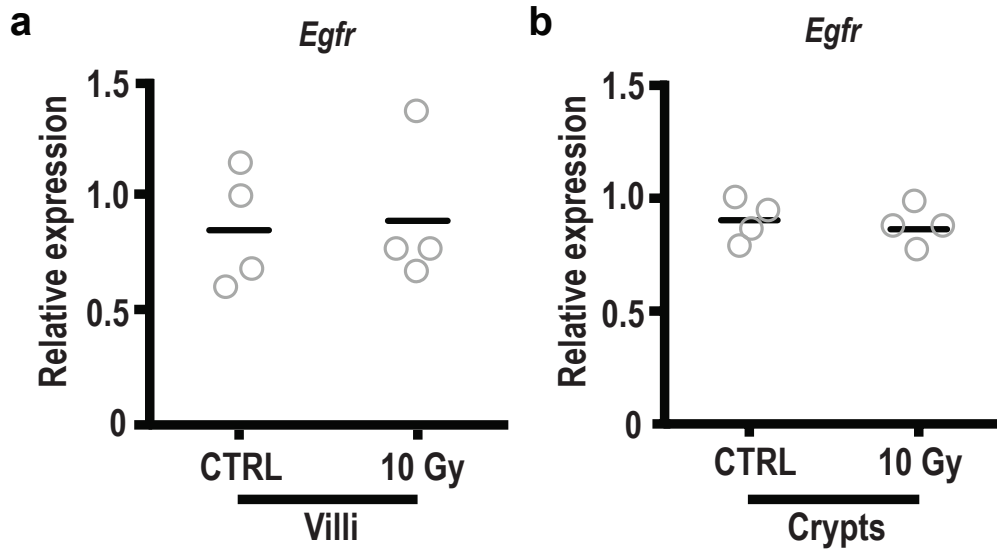

**Figure S6. Radiation injury does not change intestinal expression of *Egfr*.** qPCR for *Egfr* in villi (a) and crypts (b) isolated from small intestine five days after TBI (10 Gy); data combined from two experiments (n=4 mice/group). Comparisons were performed with the two-tailed Mann-Whitney U test. Source data for graphs are provided in the Source Data file. Graphs indicate the mean for each group.

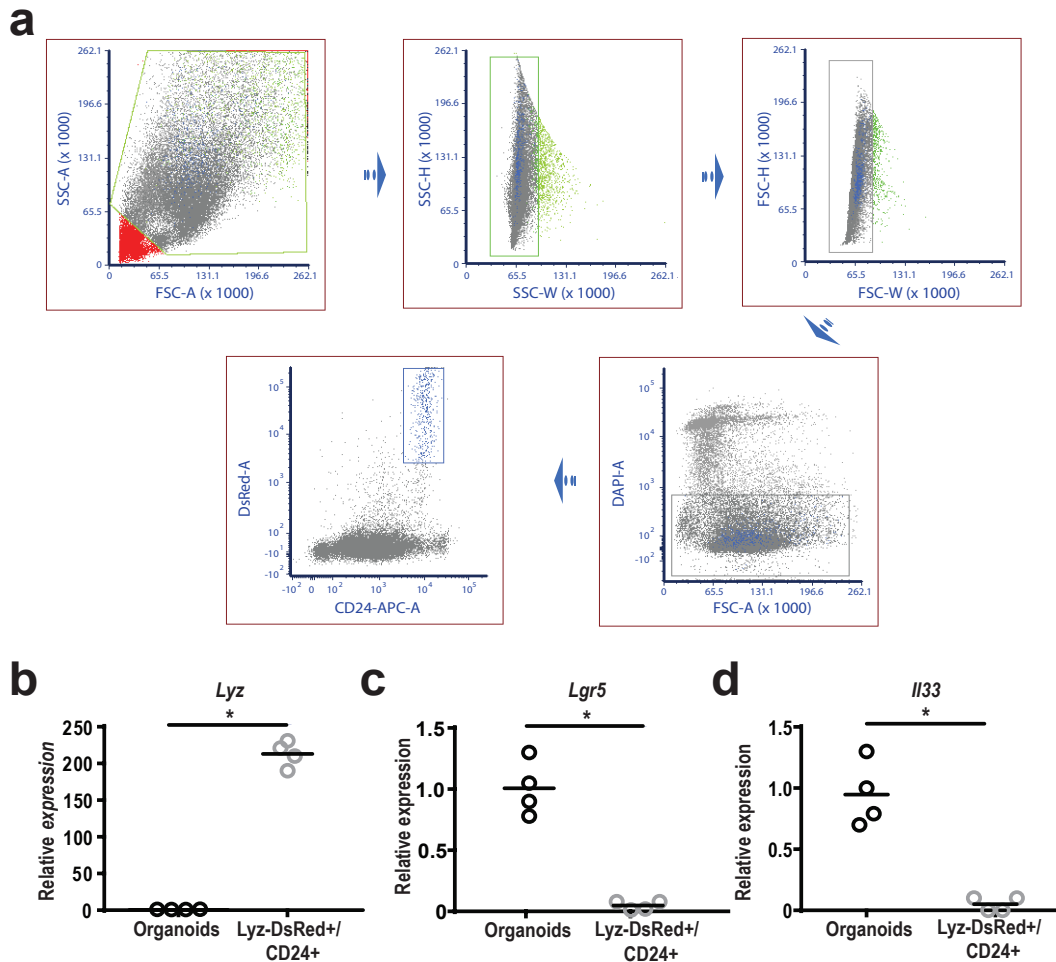

**Figure S7. Gene expression in sorted Paneth cells.** **a**, Paneth cell gating strategy: isolation of Lysozyme<sup>+</sup>CD24<sup>+</sup> Paneth cells from Lyz-DsRed mice by FACS after staining with anti-CD24 (APC). **b-d**, qPCR of sorted Paneth cells and intact organoid controls, showing relative expression of *Lyz1/2* (**b**), *Lgr5* (**c**) and *Il33* (**d**); data combined from two experiments (n=4 mice/group). Comparisons were performed using the two-tailed Mann-Whitney U test. Graphs indicate the mean for each group; \*p<.05. Source data for graphs are provided in the Source Data file. The exact p values are:

(b) Organoids vs Lyz-DsRed<sup>+</sup>, p=0.0286;

(c) Organoids vs Lyz-DsRed<sup>+</sup>, p=0.0286;

(d) Organoids vs Lyz-DsRed<sup>+</sup>, p=0.0286.

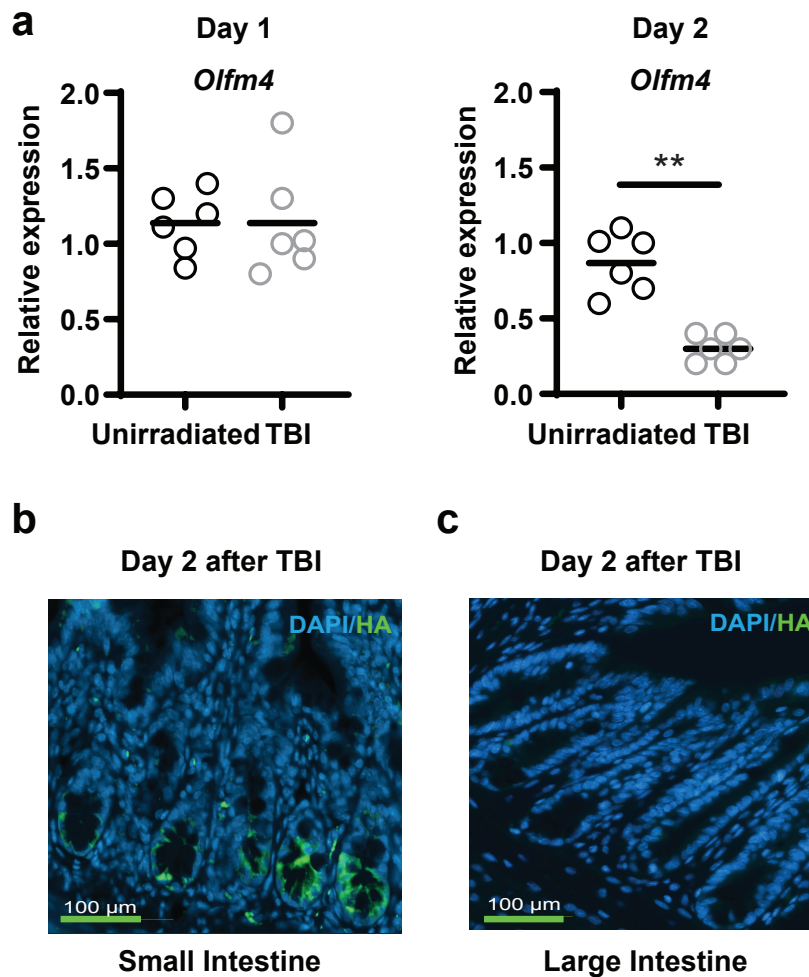

**Figure S8. Stem cell persistence after radiation injury.** **a**, Time course of *Olfm4* expression in small intestine crypts isolated from WT mice after TBI; measured by qPCR (n=6 mice/group). **b**, Representative image from *Olfm4*-Ribo small intestine (ileum) 48 hours after TBI (n=3 mice/group); blue: nuclei (DAPI), green: anti-hemagglutinin (HA). **c**, Representative image from *Olfm4*-Ribo large intestine 48 hours after TBI (n=3 mice/group); blue: nuclei (DAPI), green: anti-hemagglutinin (HA). Comparisons were performed with two-tailed Mann-Whitney U test. Plots show individual values and the means; \*\*p<0.01. Source data for graphs are provided in the Source Data file. The exact p values are as follows:

- (a) unirradiated vs Day 1 post-TBI, p=0.73;
- (b) unirradiated vs Day 2 post-TBI, p=0.002.

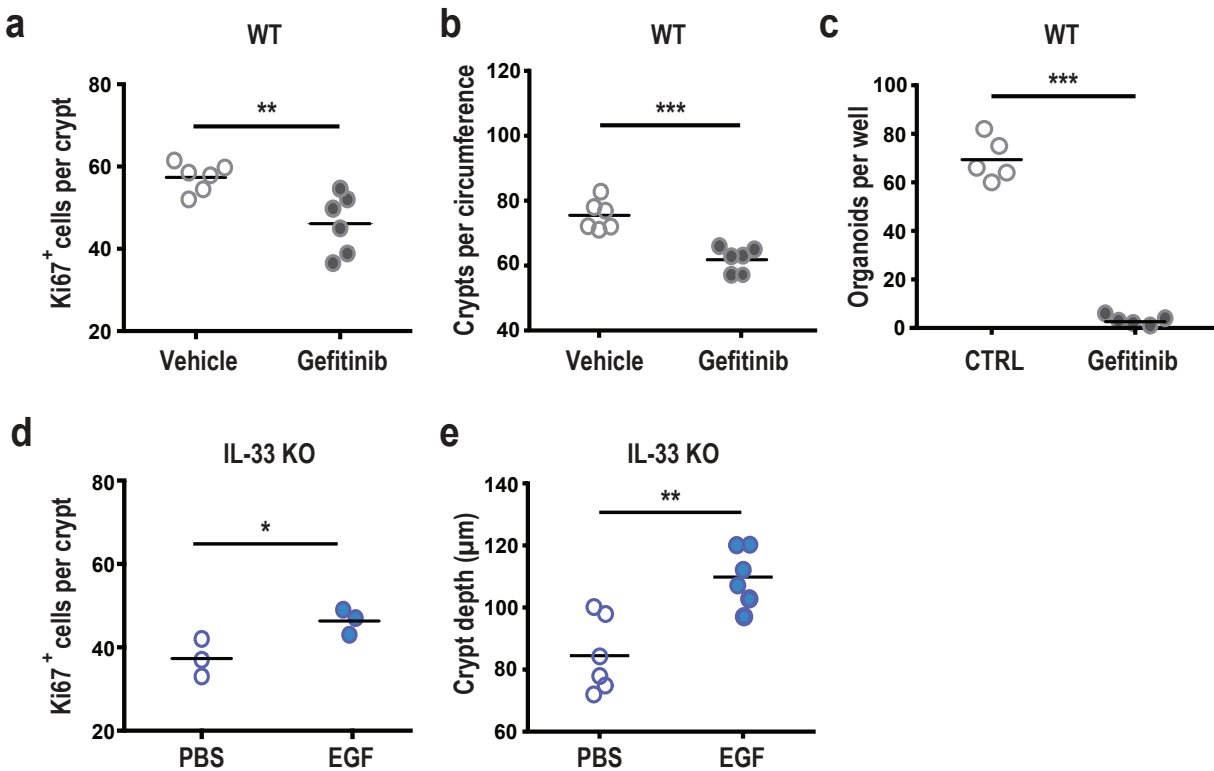

**Figure S9. EGF and IL-33 in epithelial regeneration.** **a-b**, Ileum from irradiated WT mice (10 Gy TBI) +/- gefitinib treatment (1 mg/mouse) or vehicle (daily for three days starting the day of irradiation). **a**, Average number of Ki67<sup>+</sup> cells per crypt on day five after irradiation of WT mice; combined from two independent experiments (n=6 mice/group). **b**, Crypt quantification in WT mice on day five following irradiation; data combined from two experiments (n=6 mice/group). **c**, Total number of organoids per well generated from single cells after culture for five days +/- gefitinib (1 μM); data combined from two experiments (n=5 wells/group); “CTRL” group represents gefitinib-negative control cultures. **d-e**, Ileum from irradiated IL-33 KO mice (10 Gy TBI) treated with EGF (10 μg/mouse) or PBS (daily for three days starting the day of irradiation). **d**, Average number of Ki67<sup>+</sup> cells per crypt five days after irradiation of IL-33 KO mice and daily treatment for three days (from day 0-2) with EGF or PBS (n=3 mice/group). **e**, Crypt depth in irradiated IL-33 KO mice treated with EGF or PBS daily for three days (from day 0-2); data combined from two independent experiments (n=6 mice/group). Graphs indicate the mean for each

group; comparisons performed by two-tailed unpaired t-test; \* $p < .05$ , \*\* $p < .01$ , \*\*\* $p < .001$ . Source data for graphs are provided in the Source Data file. The exact p values are:

- (a) Vehicle vs Gefitinib,  $p = 0.0068$ ;
- (b) Vehicle vs Gefitinib,  $p = 0.0003$ ;
- (c) CTRL vs Gefitinib.  $p < 0.0001$ ;
- (d) PBS vs EGF.  $p = 0.048$ ;
- (e) PBS vs EGF.  $p = 0.0021$ .

**Table S1. Antibodies utilized for flow cytometry.**

| <b>Antigen</b>         | <b>Fluorochrome</b>          | <b>Clone</b> | <b>Company</b> | <b>Catalog #</b> | <b>Dilution</b> |
|------------------------|------------------------------|--------------|----------------|------------------|-----------------|
| CD11b                  | Biotin                       | M1/70        | BD Biosciences | 557395           | 1:1600          |
| CD11c                  | Biotin                       | HL3          | BD Biosciences | 553800           | 1:200           |
| CD127                  | APC-eFluor 780               | A7R34        | eBioscience    | 47-1271-82       | 1:50            |
| CD19                   | Biotin                       | 1D3          | BD Biosciences | 553784           | 1:800           |
| CD3                    | PE-eFluor 610                | 145-2C11     | eBioecience    | 61-0031-80       | 1:100           |
| CD4                    | Brilliant Violet 711 (BV711) | RM4-5        | BioLegend      | 100549           | 1:400           |
| CD45                   | Brilliant Violet 785 (BV785) | 30-F11       | Biolegend      | 103149           | 1:400           |
| CD90.2                 | FITC                         | 53-2.1       | Biolegend      | 140303           | 1:200           |
| Fixable Viability Dye  | eFluor 455 UV                |              | eBioscience    | 65-0868-14       | 1:500           |
| KLRG1                  | Brilliant Violet 605 (BV605) | 2F1/KLRG1    | Biolegend      | 138419           | 1:50            |
| Ly-6G and Ly-6C (Gr-1) | Biotin                       | RB6-8C5      | BD Biosciences | 553124           | 1:1600          |
| ROR gamma (t)          | APC                          | AFKJS-9      | eBioscience    | 17-6988-82       | 1:100           |
| Streptavidin Conjugate | Qdot 655                     |              | Invitrogen     | Q10123MP         | 1:800           |
| Ter-119                | Biotin                       | TER-119      | BD Biosciences | 553672           | 1:400           |
| CD24                   | APC                          | M1/69        | BioLegend      | 101813           | 1:200           |
